# **Neonatal-derived IL-17 producing dermal $\gamma\delta$ T cells are required to prevent spontaneous atopic dermatitis**

Nicholas Spidale<sup>1</sup>, Nidhi Malhotra<sup>2</sup>, Katelyn Sylvia, Michela Frascoli, Bing Miu,  
Brian D. Stadinski, Eric S. Huseby and Joonsoo Kang<sup>3</sup>

Department of Pathology, University of Massachusetts Medical School  
Worcester, MA

1. current address: Celsius Therapeutics, Cambridge, MA
2. current address: Elstar Therapeutics, Cambridge, MA
3. To whom correspondence should be addressed: [Joonsoo.kang@umassmed.edu](mailto:Joonsoo.kang@umassmed.edu)

## ABSTRACT

Atopic Dermatitis (AD) is a T cell-mediated chronic skin disease and is associated with altered skin barrier integrity. Infants with mutations in genes involved in tissue barrier fitness are predisposed towards inflammatory diseases, but most do not develop or sustain the diseases, suggesting that there exist regulatory immune mechanisms to repair tissues and/or prevent aberrant inflammation. The absence of one single murine dermal cell type, the innate neonatal-derived IL-17 producing  $\gamma\delta$  T ( $T\gamma\delta 17$ ) cells, from birth resulted in spontaneous, highly penetrant AD with all the major hallmarks of human AD. In  $T\gamma\delta 17$  cell-deficient mice, basal keratinocyte transcriptome was altered months in advance of AD induction. Fulminant disease is driven by skin commensal bacteria dysbiosis and highly expanded dermal  $\alpha\beta$  T clonotypes that produce the type three cytokines, IL-17 and IL-22. These results demonstrate that neonatal  $T\gamma\delta 17$  cells are innate skin regulatory T cells. The bifurcation of type 3 cytokine producing skin T cells into the homeostatic, early innate and pathogen-sensing, late adaptive T cell compartments underpin healthy skin and accounts for the dual function of type 3 cytokines in skin maintenance and inflammation.

## INTRODUCTION

The incidence of atopic dermatitis (AD, eczema) is on a steep incline in industrialized nations with estimates suggesting as high as a quarter of children affected (1, 2). Clinical and genome wide association studies (GWAS) in humans reveal that dysfunction of key structural components of epidermal barrier, such as filaggrin, and hypersensitive type 2 (IL-4, IL-5, IL-9 and IL-13) and type 3 cytokine responses (IL-17 and IL-22), are contributing factors to AD onset and progression (3-5). The contribution of skin-targeting  $\alpha\beta$  T effector cells to AD pathogenicity is largely understood from the basic focus on damaging cytokine production and inflammatory myeloid cell recruitments. It is widely accepted that aberrant skin barrier integrity and local inflammation orchestrate the activation and recruitment of type 3 cytokine producing  $\alpha\beta$  Th17/22 cells to the skin, where they are thought to be the arbiters of the major symptoms of the disease, including visible skin damage (6-10).

Pivotal to the establishment of coordinated skin immunity are  $\alpha\beta$  and  $\gamma\delta$  T cells, and innate lymphoid cells (ILCs). Dermal ILC2 have been shown to be critical in mobilizing type 2 cytokine responses in AD, but very little is known about the function of innate skin T cells in autoimmunity. During the neonatal period, skin is populated by several  $\gamma\delta$ TCR<sup>+</sup> and  $\alpha\beta$ TCR<sup>+</sup> T cell subsets, whose effector functions are thymically programmed to produce IL-17, and to a lesser extent IL-22, upon

activation in tissues. IL-17 producing  $\gamma\delta$  T cells (T $\gamma\delta$ 17) are referred to as innate-like and the  $\gamma\delta$  T cell lineage is subject to the same effector subtype classification (Types 1, 2 and 3 cytokine producers) as adaptive T helper cells and ILCs. T $\gamma\delta$ 17 cells expressing V $\gamma$ 2TCR (Garman TCR $\gamma$  nomenclature, (11)) are exported from the thymus after birth and rapidly populate the newborn dermis. These cells are part of the neonatal wave of tissue-resident lymphocytes that are not generated efficiently from adult bone marrow hematopoietic stem cells, and are referred to as neonatal innate T $\gamma\delta$ 17 (nT $\gamma\delta$ 17) cells (12).

Studies to date have established that nT $\gamma\delta$ 17 cells are the central population of the skin immunocyte subsets and are the most dominant IL-17 producing cells upon acute skin inflammatory perturbations (13-17). nT $\gamma\delta$ 17 cells are absolutely required for acute Imiquimod (TLR7-agonist)-induced psoriasis in adult mice. Humans with the loss of function allele of the IL-17R signaling component ACT1 (*Traf3ip2*) are more susceptible to psoriasis (18), but Act1-deficient mice are afflicted with spontaneous skin inflammatory diseases (19, 20). Moreover, mice that lack IL-17R on radioresistant epithelial cells develop AD, in genetic background with a type 2 cytokine production bias (21). In the former, skin pathology was attributed to hyper IL-22 production, and in the latter, diminished filaggrin expression and impaired skin barrier was implicated as the cause of AD susceptibility. In both models the apparent disease-protective function of IL-17 in skin homeostasis was not addressed. Thus, while some studies imply that IL-17 can act as a homeostatic factor to prevent aberrant inflammation in the skin, the cellular source and developmental timing of homeostatic IL-17 function is unknown.

Increases in T $\gamma\delta$ 17 cells in patients with aberrant skin inflammation have been observed in AD (13, 22, 23), but accurate assessments of their contribution to human disease has lagged, in part due to challenges of isolating these cells from human tissues (24). Possible dual homeostatic and inflammatory roles for IL-17 and IL-22, or cells that can produce them, have also limited the use of cytokine and T cell deficient mice to unveil their context-dependent contribution to skin disease pathogenesis. We show here that mice specifically lacking IL-17-producing nT $\gamma\delta$ 17 cells succumb to a highly penetrant spontaneous AD that captures most characteristic disease features of human AD. Fulminant disease in the mice is associated with hyperactive ILC2 and requires both skin commensal bacteria (CB) and expansion of clonal  $\alpha\beta$  T cells. The initial trigger for the disease is linked to aberrant keratinocyte differentiation at young ages. Thus, nT $\gamma\delta$ 17 skin sentinels are essential to maintain skin homeostasis, in part by promoting normal keratinocyte barrier formation in perinatal period.

## RESULTS

### Spontaneous AD in *Sox13*<sup>-/-</sup> mice specifically lacking V $\alpha$ 2 T $\gamma$ $\delta$ 17 cells

To study the role of V $\alpha$ 2 T $\gamma$  $\delta$ 17 cells in skin immunity, we have generated mice deficient in *Sox13*, an HMG box transcription factor (TF) essential for their development (15, 25). In the immune system *Sox13* expression is restricted to early hematopoietic stem/progenitors and  $\gamma$  $\delta$  T cells. Mice lacking *Sox13* have a highly selective defect in V $\alpha$ 2 T $\gamma$  $\delta$ 17 cell development with all other hematopoietic cell types normally preserved (15, 16). One exception is innate iNKT17 cells that are partially affected (26), but these cells are rare in the skin. Incompatible with the pro-inflammatory nature of V $\alpha$ 2 T $\gamma$  $\delta$ 17 cells, >90% of *Sox13*<sup>-/-</sup> mice (>250 mice cumulatively tracked over several years) of both sex develop visible dermatitis in the muzzle, ears, eyes and elsewhere around three to four months of age, displaying the hallmarks of human AD (2, 27-29). Pathophysiology included epidermal thickening (acanthosis, Fig. 1A, Top), marked accumulation of immunocytes in skin epithelial lesions leading to eosinophilia, neutrophilia, and increases monocytes (Mo) and Mo-derived dendritic cells (DCs) in the skin (Fig. 1B-F). Crucially, age-dependent increases in IgE titer, evident by 3 months of age of the mice (Fig. 1H), before visible signs of disease, captured one of the major symptoms of human AD. In addition, expanded ILC2 (GATA3<sup>hi</sup>) associated with human AD (29-31), and their capacity to produce the type 2 cytokines IL-5 and/or IL-13, was recapitulated in *Sox13*<sup>-/-</sup> mice (Fig. 1G, Supp Fig. 1A-C). Conversely, in young *Rora*<sup>-/-</sup> mice lacking in ILC2 (32) there is an increase in nT $\gamma$  $\delta$ 17 cells with enhanced capacity to produce type 3 cytokines (Supp Fig. 1D), suggesting a possible counter-regulation between nT $\gamma$  $\delta$ 17 cells and ILC2.

### Expanded $\alpha\beta$ T cells are required for AD

Significant expansion of  $\alpha\beta$  T cells in the skin of *Sox13*<sup>-/-</sup> mice was evident starting ~3 months of age, prior to any visible skin inflammation. Both CD4<sup>+</sup> and CD8<sup>+</sup> T cells increased in numbers up to 10-fold by 6 months of age, depending on skin sites (Fig. 2A). Notably, CD4<sup>neg</sup>CD8<sup>neg</sup> (double negative, DN) T cells accounted for 10-20% of TCR $\beta$ <sup>+</sup> cells in the skin of both LMC and *Sox13*<sup>-/-</sup> mice, with a significant expansion observed in *Sox13*<sup>-/-</sup> skin (Fig. 2A). Utilizing the MR1/5-OP-RU tetramer, we identified that the DN subset in both healthy and AD skin consisted primarily of MAITs (Fig. 2B). CD4<sup>+</sup> or CD8<sup>+</sup> MAITs were rare in the skin of WT mice, with only marginal increase in CD8<sup>+</sup> MAITs in *Sox13*<sup>-/-</sup> skin (Supp Fig. 2A). In the skin draining LNs (dLNs), only subtle increase in the frequency of MAITs was observed in *Sox13*<sup>-/-</sup> mice, with the majority being

the CCR6<sup>+</sup>CD4<sup>+</sup> subset in all mice (Supp Fig. 2B). iNKT cells were rare in the skin and no significant alterations were observed in *Sox13*<sup>-/-</sup> mice (Supp. Fig. 2C).

The majority of  $\alpha\beta$  T cell subsets in AD were associated with enhanced capacity to produce both IL-17 and IL-22, whereas in control mice very few CD4<sup>+</sup> or CD8<sup>+</sup>  $\alpha\beta$  T cells were capable of IL-17 production, and even more constrained IL-22 secretion was evident (Fig. 2C). DN MAIT cells were primed for IL-17 in both LMC and *Sox13*<sup>-/-</sup> mice. In contrast to the enhanced type 3 cytokine production, the frequency of Th2 cells was not altered significantly in *Sox13*<sup>-/-</sup> skin, although numerically they were also enhanced. Similarly, although the frequency of skin FOXP3<sup>+</sup> regulatory T cells (Tregs) was decreased in the ear, but not muzzle, skin of *Sox13*<sup>-/-</sup> mice, their numbers were comparable to controls (Supp Fig. 2D), indicating preferential expansion of effector populations. Matching the T cell expansion in skin there was an ~8 fold expansion in cellularity in dLNs (Fig. 2D). The trend to this increase was evident before visible skin lesions, at ~3 months of age, and was associated with greatly increased numbers of spontaneous germinal centers (GCs), typical of autoimmune disorders (33), with aberrant GC formation (green, Fig. 2E) in the T cell zone (blue, Fig. 2E) and increased number of follicular T help (Tfh) cells, GC B cells and plasma cells (Fig. 2F and Supp Fig. 2E - G).

To determine whether the expansion of skin T cells was correlated to more efficient display of skin antigens in dLN, melanocyte-specific antigen presentation in *Sox13*<sup>-/-</sup> mice was assessed. Naïve PMEL17 CD8<sup>+</sup> TCR transgenic T cells specific for a melanocyte antigen (34) were labeled with CFSE and transferred into *Sox13*<sup>-/-</sup> and WT hosts, and their proliferation was analyzed by CellTrace Violet dilution (Supp Fig. 2H, I). We observed a 3-fold increase in PMEL17 T cells proliferation in skin dLNs of *Sox13*<sup>-/-</sup> mice compared to controls. In contrast, no differences in proliferation were observed at distal sites, including the spleen. Finally, to demonstrate that  $\alpha\beta$  T cells are required for AD in *Sox13*<sup>-/-</sup> mice, skin pathology in *Sox13*<sup>-/-</sup>*Tcrb*<sup>-/-</sup> was monitored. The absence of  $\alpha\beta$  T cells prevented AD development with no visible evidence of skin inflammation and skin histology was grossly normal, including lack of epidermal hyperplasia (Fig. 2G).

To ascertain corresponding changes in the expression of secreted inflammatory mediators RNA was isolated from the muzzle skin at 6 months of age and select cytokine and chemokine gene expression was assessed by quantitative RT-PCR (Supp Fig. 1E). A coordinate induction of the cytokines IL-1 $\beta$ , IL-6 and IL-23, which promote type 3 cytokine producing lymphocytes, was prominent. A simultaneous increase in the danger associated molecular pattern molecule IL-33

was observed, which has been associated with skin inflammation (30, 35) Collectively, these results indicated that prior to the onset of visible diseases, B and T cells expand, with evidence for IgE hyperproduction. With the progression of disease, the skin displays a prominent type 3 effector inducing cytokine milieu with attendant expansion of Th17 cells and IL-17<sup>+</sup> MAITs. Thus, fulminant AD in *Sox13*<sup>-/-</sup> mice is predicated on Th17 and Th17-like cells of  $\alpha\beta$  T cell lineage.

### **Altered basal keratinocyte differentiation program in *Sox13*<sup>-/-</sup> mice**

To map the sequence of early cellular and molecular alterations in *Sox13*<sup>-/-</sup> mice that can account for the eventual inflammatory immune landscape, we first assessed the impact of the loss of nT $\gamma\delta$ 17 cells on differentiating keratinocytes. For this we undertook a whole transcriptome analysis of basal CD49f<sup>+</sup> (*Itga6*) keratinocytes of *Sox13*<sup>-/-</sup> mice at 3 and 7 weeks (wks), well before the onset of aberrant skin inflammation starting in ~3 months old (mo) mice. This population was chosen because they contain keratinocyte stem cells and progenitors (36, 37) and the two timepoints coincide with the hair follicle catagen cycle, characterized by active keratinocyte differentiation followed by the relatively quiescent telogen cycle, respectively (38). In all 261 genes were differentially expressed ( $\geq 2$  fold changes,  $p < 0.05$ ) between 3 wk WT vs *Sox13*<sup>-/-</sup> basal keratinocytes (Fig. 3A). Gene Ontology (GO) enrichment analysis revealed pronounced cell apoptosis signatures and stress responses in *Sox13*<sup>-/-</sup> basal keratinocytes (Fig. 3B). At 7wk the difference was muted with 50 genes differentially expressed (Fig. 3A) with no significant clustering of these genes into specific biological processes, likely reflecting the resting state of basal keratinocytes in the telogen phase. Expression of only 3 genes, *Igfbp3*, *Mir-17hg* (Mir-17-92) and *4930480K23Rik* (non-coding RNA), was altered at both ages. *Igfbp3* and *Mir-17hg* (Mir-17-92) have been shown to be associated with skin inflammations (39, 40) and their expression was initially decreased in *Sox13*<sup>-/-</sup> basal keratinocytes, but this pattern was flipped at 7wk. *Sox13*<sup>-/-</sup> mice prior to 2 months do not show any significant alterations in skin immune subsets or visible damage, and consistent with this *Sox13*<sup>-/-</sup> basal keratinocytes showed no significant alterations in the expression of inflammatory mediators of immunocytes at 3 and 7 wks. Genes encoding for the structural components of the skin barrier including gap junction proteins, extracellular matrix (except collagens at 3wk) and keratins, were also not altered in expression. However, expression of several genes critical for normal differentiation of basal keratinocytes was altered at 3wk, including diminished expression of the IL-17 target Blimp1 (*Prdm1*) (41, 42), *Sox9* (43), *Runx1*, *Irf3/6*, *S100a11*, and increased expression of *Myc* (44), *Dlx3*, *Trp73* and *Maf*. In addition, genes in the TGF $\beta$ , Lymphotoxin and the JAK-STAT signaling pathways had lower levels of expression in *Sox13*<sup>-/-</sup> basal keratinocytes. Genes controlling barrier fitness, such as *Trex2*, *Epcam*, *Adam17*,

*Itga2*, *Cdh3*, *Tgm4*, *Il31ra*, *Il1rn* and *Jup*, were decreased in expression, whereas *Def*, *Lrrc31* and *Tsc22d3* (GILZ) were increased in *Sox13*<sup>-/-</sup> keratinocytes (Fig. 3C). Together, these results indicate that T $\gamma$  $\delta$ 17 cells are critical for establishing normal developmental program of basal keratinocytes during the catagen cycle, and in their absence the data suggests that altered keratinocyte differentiation signatures are linked to increased propensity to apoptosis.

### **Skin commensal bacteria dysbiosis in *Sox13*<sup>-/-</sup> mice is responsible for AD**

Analysis of differentiated keratinocytes at 2 months or later does not allow for clear distinction between impaired barrier function arising from keratinocyte-intrinsic defects or from inflammatory immunocyte-mediated degradation. In patients with AD, expansions of *Staphylococcus* and *Corynebacteria* species are often observed in skin lesions (5, 9, 45, 46) and mouse models of AD with barrier defects replicate the AD-associated microbiome dysbiosis. Thus, one prediction of the altered keratinocyte differentiation and barrier function well before the onset of chronic inflammation in young *Sox13*<sup>-/-</sup> mice is that the homeostasis of skin commensal bacteria (CB) with the barrier will be disrupted, with the resultant dysbiosis driving the immune responses. We tested this possibility by first establishing skin microbiota of *Sox13*<sup>-/-</sup> mice at 3 and 6 mo by 16S rRNA sequencing, followed by assessment of antibiotic treatment (Abx) on AD onset and progression. As in human AD patients, AD in *Sox13*<sup>-/-</sup> mice was associated with dysbiosis of *Staphylococcus* and *Corynebacteria*, but with distinct kinetics (Fig. 4A). Most *Sox13*<sup>-/-</sup> mice showed an early bloom of *Corynebacteria* (*C. mastitis*), with the expansion maintained in some mice, but for the majority returning to the LMC frequencies at 6 mo. Expansion of *Staphylococcus* was pronounced at the frank phase of disease but was not obvious at 3 mo. These results largely recapitulate skin CB dysbiosis in two mouse models of AD (9, 21).

To determine whether skin CB is necessary for AD initiation and/or progression in *Sox13*<sup>-/-</sup> mice we treated the mice from birth or starting at 3 mo with a combination of antibiotics (cefazolin and enrofloxacin in drinking water) previously used for a similar purpose (9). Skin commensal sequencing of Abx mice confirmed that *Staphylococcus* and *Corynebacterium* species were significantly reduced (Supp Fig. 3A). Regardless of regimens, the Abx *Sox13*<sup>-/-</sup> mice were protected from AD. All pathophysiological features of AD were absent, with resolution of acanthosis (Fig. 4B), decreased serum IgE concentrations (Fig. 4C), and suppression of myeloid expansion (Fig. 4D). While CD4<sup>+</sup> cells remained at an elevated frequency, IL-17 and IL-22 production was significantly reduced (Fig. 4E). Further, all disease-associated phenotypes of the dLN were corrected by Abx treatment, leading to reduction of total cell number, and the

normalization of Tfh, GC B cell, and plasma cell frequencies (Fig. 4F-I). We also tested whether the disease initiation is restricted to a narrow developmental window spanning neonatal-juvenile stages. For this, *Sox13*<sup>-/-</sup> mice were treated with the antibiotic cocktail from birth and then the treatment was terminated at 3 wks of age. AD development was not prevented in mice treated only acutely at birth, suggesting that continuous skin commensal-immunocyte crosstalk contributes to the disease postnatally and delayed/altered commensal interactions during neonatal stage do not permanently remodel skin pathophysiology.

### **T $\gamma$ $\delta$ 17 cells respond to skin CB by IL-1 and IL-23 secreted by APCs**

Commensal dysbiosis is known to result from impaired barrier functions. That nT $\gamma$  $\delta$ 17 cells themselves normally respond to *Corynebacteria/Staphylococcus* and the absence of nT $\gamma$  $\delta$ 17 cells also directly contributes to the aberrant microbiome expansion was assessed next. A recent report of nT $\gamma$  $\delta$ 17 cell activation in SPF mice topically colonized with *C. accolens* (47) strongly supported this possibility. There are two T $\gamma$  $\delta$ 17 subsets in mice. Along with V $\gamma$ 2<sup>+</sup> nT $\gamma$  $\delta$ 17 cells, the dermis contains the canonical V $\gamma$ 4TCR<sup>+</sup> fetal derived T $\gamma$  $\delta$ 17 (fT $\gamma$  $\delta$ 17) cells, which are not dependent on *Sox13* for populating the skin (15). Thus, an obvious question is why dermal nT $\gamma$  $\delta$ 17 cells are functionally non-redundant in suppressing AD initiation. Whereas fT $\gamma$  $\delta$ 17 cell persistence is dependent on CB (48) and parallels dermal Th17 and Tc17 cells (14), nT $\gamma$  $\delta$ 17 cells were not, as assessed in germ free (GF) mice (Supp Fig 3B). Abx WT mice also showed the loss of skin fT $\gamma$  $\delta$ 17 cells (V $\gamma$ 2<sup>neg</sup>V $\gamma$ 3<sup>neg</sup> quadrant, Supp Fig 3C) and the loss of tonic *Il17a* transcription by residual fT $\gamma$  $\delta$ 17 cells (V $\gamma$ 2<sup>neg</sup>) in Abx WT mice. In contrast, constitutive *Il17a* transcription in nT $\gamma$  $\delta$ 17 cells was not suppressed by Abx (Supp Fig 3C, D). These results indicate unique homeostatic activation requirements for dermal nT $\gamma$  $\delta$ 17 cells.

To determine how nT $\gamma$  $\delta$ 17 cells normally react to skin CB, they were isolated from dLNs and stimulated with a diverse set of *Staphylococcus* and *Corynebacteria* species in transwell cultures with antigen presenting cells (APCs). While *Corynebacteria* consistently stimulated copious IL-17 but not IFN $\gamma$ , production from V $\gamma$ 2<sup>+</sup> nT $\gamma$  $\delta$ 17 cells, so did *Staphylococcus* species, albeit with a consistent diminution of IL-17 amounts per cell (Fig. 5A). For comparison, fT $\gamma$  $\delta$ 17 cells showed indistinguishable pattern of CB reactivity. This T $\gamma$  $\delta$ 17 activation was not T-APC contact dependent, as similar levels of IL-17 production was elicited when CB-activated APCs were separated from nT $\gamma$  $\delta$ 17 cells in transwells, indicating sufficiency of trans-acting factor(s) (Fig. 5B). Given that IL-1 and IL-23 from activated APCs was linked to T $\gamma$  $\delta$ 17 effector cytokine production



in peripheral tissues (49), both cytokines were quenched by Ab in the same culture to test whether they are the trans activating factors in the skin. Transwell cultures in which nT $\gamma$  $\delta$ 17 (or fT $\gamma$  $\delta$ 17) cells were cultured in a separate compartment from CB-APC and then blocked with Abs against the cytokines showed significantly reduced IL-17 production (Fig. 5C and data not shown). Collectively, these results indicate that nT $\gamma$  $\delta$ 17 and fT $\gamma$  $\delta$ 17 cells respond comparably to skin CB that are altered in AD, and that this reactivity can occur independently of direct contact with CB-APCs. Thus, biases in CB recognition by nT $\gamma$  $\delta$ 17 and fT $\gamma$  $\delta$ 17 *per se* are unlikely to explain the necessity of nT $\gamma$  $\delta$ 17 cells for skin homeostasis. To date, type 3 cytokine producing T cells with established functions in the skin have been shown to require CB for persistence. However, nT $\gamma$  $\delta$ 17 cells can be maintained and function in the skin independent of CB, a distinguishing characteristic that likely underpins the non-redundancy of nT $\gamma$  $\delta$ 17 cells in controlling aberrant skin inflammation.

#### **V $\beta$ 4<sup>+</sup>V $\alpha$ 4<sup>+</sup> $\alpha$ $\beta$ T clonotypes dominate the diseased skin of *Sox13*<sup>-/-</sup> mice.**

The expanded  $\alpha$  $\beta$  T cells in *Sox13*<sup>-/-</sup> mice are required for AD progression. If the expansion is antigen driven a prediction would be that there would be restricted TCR repertoire in skin infiltrating  $\alpha$  $\beta$  T cells of *Sox13*<sup>-/-</sup> mice. To test this, we first assessed TCRV $\beta$  chain repertoire of CD4<sup>+</sup> T cells by flow cytometry. While the TCRV $\beta$  usage of dLN T cells of WT and *Sox13*<sup>-/-</sup> mice was indistinguishable, skin CD4<sup>+</sup> T cells in *Sox13*<sup>-/-</sup> mice were dominated by the usage of V $\beta$ 4 TCR, starting at 3 months of age and reaching a plateau at ~5-6 months (Supp Fig. 4A, B). As skin inflammation progressed to overt disease (~5 mo), the frequency of V $\beta$ 4<sup>+</sup> CD4<sup>+</sup> T cells increased ~3-fold and in 5-6 mo *Sox13*<sup>-/-</sup> mice the total number of skin CD4<sup>+</sup> T cells was more than 10-fold greater in *Sox13*<sup>-/-</sup> mice than WT mice, depending on the skin site, with up to 50% of these cells expressing V $\beta$ 4 TCR (Fig. 6 A-C). In comparison, TCR V $\beta$  skewing was not consistently observed for any other V $\beta$ s or for any TCRs associated with FOXP3<sup>+</sup> Tregs or CD8<sup>+</sup> T cells (Supp Fig. 4B, C). The increased cellularity in diseased *Sox13*<sup>-/-</sup> skin, combined with the strong V $\beta$ 4-bias and increased proliferation of skin V $\beta$ 4<sup>+</sup>CD4<sup>+</sup> T cells in *Sox13*<sup>-/-</sup> mice (Supp Fig. 4D), suggested that these CD4<sup>+</sup> T cells were undergoing expansion in the skin.

Cytokine production from skin-infiltrating CD4<sup>+</sup> T cells was assessed to correlate effector function with the TCR V $\beta$  repertoire. In WT mice, Th17 cells (IL-17<sup>+</sup> and IL-17/22<sup>+</sup>) were found in both V $\beta$ 4<sup>+</sup> and V $\beta$ 4<sup>-</sup> dermal CD4<sup>+</sup> T cell populations, but there was a biased representation of these effectors within V $\beta$ 4<sup>+</sup> T cells (Fig. 6D, E). ~10% of WT skin CD4<sup>+</sup> T cells were geared for IL-13 and/or IL-4 production, but there were negligible numbers of skin Th1 and Th22 cells (data not

shown). In contrast, *Sox13*<sup>-/-</sup> AD skin lesions were enriched in Th17 subset and a larger population of dual IL-17<sup>+</sup>/22<sup>+</sup> Th17 cells, which were strongly biased to Vβ4<sup>+</sup> T cells (Fig. 6D, E). Moreover, another AD-associated Th subset was the IL-22-only Th22 cells (10, 28), which predominantly expressed Vβ4 (Fig. 6E). Frequencies and TCR Vβ repertoire of skin Th2 cells (~10% of CD4<sup>+</sup> T cells) and cytokine producing skin CD8<sup>+</sup> T cells (from WT and *Sox13*<sup>-/-</sup> mice) were unchanged in *Sox13*<sup>-/-</sup> mice at 3 and 6 mo (data not shown). To demonstrate that the expanded CD4<sup>+</sup> T cells critically contribute to AD, *Sox13*<sup>-/-</sup> mice were treated with CD4 T cell depleting Abs starting at 3 mos of age for 3 mos. Skin inflammation significantly improved, including substantially reduced epidermal hyperplasia (Fig. 6F, G) and amelioration of eosinophil and neutrophil infiltration (data not shown). Collectively, these results indicate that CD4<sup>+</sup> αβ T cells are the major driver of AD in *Sox13*<sup>-/-</sup> mice and Vβ4<sup>+</sup> CD4<sup>+</sup> T cell expansion with enhanced IL-22 production is the primary distinguishing feature of αβ T cells in AD, dovetailing with findings in human severe AD (10).

To test the possibility of clonal TCRVβ4<sup>+</sup> T cell expansion, we used high throughput sequencing to identify TCR Vβ clonotypes expressed on conventional αβ T cells of WT and *Sox13*<sup>-/-</sup> mice at 5 months of age. We interrogated cells expressing Vβ4 TCRs, as well as ones expressing Vβ2, 6 and 8. Collectively, these T cells represent 50-70% of CD44<sup>+</sup>CD4<sup>+</sup> T cell repertoires. Analyses of skin from healthy mice revealed a single, dominant clonotype (CDR3β: CASSQDSSAETLYF) expressed on ~70% of all CD44<sup>+</sup>Vβ4<sup>+</sup>CD4<sup>+</sup> T cells (Fig. 6H). Notably, CD4<sup>+</sup> T cells expressing this TCR Vβ clonotype along with a related Vβ4 sequence (CDR3β: CASSPDSSAETLYF) were strongly expanded in diseased *Sox13*<sup>-/-</sup> mice, making up >75% of Vβ4<sup>+</sup> conventional CD4<sup>+</sup> T cells. These clonotypes, which we denote as the common Vβ4 (comVβ4), were less frequent in activated/memory T cells in dLNs (2-3% of CD4<sup>+</sup> T cells), and detectable only at minute frequencies in naïve T cells (< 0.1%). In comparison, TCRβ chains expressed on skin-resident CD8<sup>+</sup> T cells in WT and *Sox13*<sup>-/-</sup> mice were oligoclonal (data not shown).

To begin to identify TCRαβ clonotypes, 15 CD4<sup>+</sup> skin T cell lines were established from *Sox13*<sup>-/-</sup> AD skin and converted to hybridomas. Although this approach was inefficient, four Vβ4<sup>+</sup> T hybridomas expressed the comVβ4 chain, all of which were paired with a conserved Vα4.9 chain (comVα4, CALSDNTGNYKYVF). TCRα deep sequencing of total skin CD4<sup>+</sup> T cells confirmed that >90% of the Vα4<sup>+</sup> cells expressed the comVα4 chain in the skin of diseased *Sox13*<sup>-/-</sup> mice (Fig. 6I), while these clonotypes were rare in dLNs. Together, these studies reveal that ~25% of all skin

CD4<sup>+</sup> T cells in AD mice express two related TCR clonotypes composed of V $\beta$ 4V $\alpha$ 4.9 TCR, indicative of antigen-specific clonal expansion.

## DISCUSSION

When there are systemic structural breakdowns of the skin barrier, dysregulated immunity leads to uncontrolled inflammation. Most mouse models of AD to date involve either a systemic breakdown of the skin barrier (e.g. filaggrin/matted (50, 51) or *Adam17*-deficient (9)), or rely on heavy manipulations of the skin (e.g. tape stripping followed by antigen challenge (52) or topical applications of inflammatory cytokines, such as IL-23 (53)) and they may not reflect natural progression of AD. In particular, physiological events that contribute to skin barrier damage in postnatal animals have not been modeled for experimentation. Moreover, identification of pathogenic CD4 T cell clones and events that trigger adaptive T cells that culminate in AD have not yet been systematically investigated. Here, removal of one innate dermal T cell sentinel subset that normally populates the neonatal skin is sufficient to cause spontaneous, highly penetrant AD, with all the major hallmarks of the human disease. Early changes in basal keratinocyte transcriptome, well before the onset of fulminant disease, are consistent with an altered barrier formation that is likely to have linkage CB dysbiosis and the damaging immune responses that ensue. Our model thus serves to close fundamental gaps in understanding of AD and identify dermal innate nT $\gamma$  $\delta$ 17 cells as skin regulatory T cells.

AD in *Sox13*<sup>-/-</sup> mice is driven by Th17 cells, and transfer studies using CD44<sup>hi</sup> T cells from dLNs of diseased *Sox13*<sup>-/-</sup> mice did result in AD-like symptoms in *Sox13*<sup>-/-</sup>, but not in LMC host (data not shown). However, the hosts need to be primed for the disease transfer, by sublethal irradiation and skin scarring, and the kinetics of disease induction and severity were variable. Predictable kinetics of AD transfer using dermal T cells from diseased *Sox13*<sup>-/-</sup> mice would be ideal, and we are currently attempting to establish more physiological priming conditions for these studies. That the disequilibrium between tissue resident innate T cell source of IL-17 and expansive adult Th17 cells is the central feature of AD provides a new paradigm of immune interactome to account for both the homeostatic and inflammatory function of the type 3 cytokines in multiple tissues.  $\gamma$  $\delta$  T cells as a population have been suggested to regulate inflammation and  $\alpha$  $\beta$  T cell responses in mucosal tissues, based on dysregulated type 2 cytokine responses in the lung of *Tcrd*<sup>-/-</sup> mice (54-56), spontaneous skin inflammation in *Tcrd*<sup>-/-</sup>:FVB background (57), and keratitis in *Tcrd*<sup>-/-</sup>:B10 mice (58). However,  $\gamma$  $\delta$  T cell subset-specific function in these disease models were unknown and T $\gamma$  $\delta$ 17 cells have been considered principally as an inflammatory/pathogenic cell type, required

for psoriasis and EAE (49), ocular responses to *C. mastitidis* to protect against fungal infection (59), and intestinal responses to *Listeria* (60). In the frontline mucosal tissues there are several innate and conventional T cells that can produce IL-17, including  $T\gamma\delta17$ , MAITs, iNKT17, ILC3, Tc17 and Th17 cells. While the homeostatic role of IL-17 in the skin was documented (19-21) the critical cell source of IL-17 was not known. We show that  $V\gamma2TCR^+$  n $T\gamma\delta17$  cells is that source necessary to prevent the skin CB dysbiosis dependent inflammation cascade.

Given that there exists multiple innate type 3 cytokine producing T cells, it remains unclear why n $T\gamma\delta17$  cells are indispensable in skin homeostasis. The alternate fetal-derived PLZF<sup>+</sup>  $V\gamma4TCR^+$  f $T\gamma\delta17$  cells in adipose tissues are required for normal thermogenic responses (61) and they are also present in most mucosal tissues (62). While *Sox13*<sup>-/-</sup> mice generate reduced numbers of f $T\gamma\delta17$  cells from the postnatal thymus, their numbers in peripheral tissues normalize over time (15). Thus, in both AD and psoriasis models,  $V\gamma2^+$  n $T\gamma\delta17$  cells are the critical mediators of skin homeostasis and acute inflammation, and the  $V\gamma4^+$  counterpart, and other innate IL-17 producing T cells such as DN MAITs that are present in the dermis of *Sox13*<sup>-/-</sup> mice, cannot functionally compensate for the loss of n $T\gamma\delta17$  cells. So far, only two molecular features distinguish these two  $\gamma\delta$  T cell subtypes in the dermis: highly biased expression of the scavenger receptor Scart2 on n $T\gamma\delta17$  cells (63) and the distinct TCRs. The nature of ligands recognized by these receptors is unknown, but given the independence of n $T\gamma\delta17$  cells from skin CB for their development and persistence in the skin, the likelihood of novel environmental cues determining their function is high.

We are actively investigating the ligand recognized by  $V\beta4/V\alpha4$  clonotype T cells. Skin Th17 cells are absent in GF mice, and their numbers are restored to the normal range in Abx *Sox13*<sup>-/-</sup> mice, indicating their dependence on CB. However, skin T cell hybridomas expressing the clonotypic  $V\beta4$  TCR did not respond to various *Staphylococcus* and *Corynebacteria* species, suggesting these cells respond to other CB or skin antigens. Skin CD8<sup>+</sup> Tc17 cells recognize *S. epidermidis*-derived *N*-formyl methionine peptides presented by the non-classical MHC-Ib molecule H2-M3 (64) and it is possible that  $V\beta4/V\alpha4$  clonotypes also recognize non-conventional MHC molecules. MR1-5-OP-RU or CD1d-PBS tetramers did not stain skin  $V\beta4^+$  T cells, ruling out the obvious candidates as likely ligands.

The emerging model of AD progression is then that tonic IL-17/22 produced by nT $\gamma$  $\delta$ 17 cell recognitions of CB and other skin-specific cues promote normal development of keratinocytes in postnatal mice. In the absence of this lymphoid-epithelial crosstalk, skin CB dysbiosis develops in conjunction with altered skin barrier, driving APC activation and setting in motion aggressive activation, infiltration and expansion of type 3 cytokine producing T cells that are primarily focused on dealing with altered CB, but also result in collateral skin degradation. In parallel, damaged skin releases DAMPs, such as IL-33 that activates ILC2, which in turn promote Th2 responses (30). Cytokines and chemokines copiously produced by activated skin lymphocytes perpetuate eosinophilia and neutrophilia that chronically worsen skin damage. In this setting, skin Tregs do not significantly impact the disease progression, as their sustained depletion does not impact AD amelioration caused by conventional CD4 T cell ablation (Fig. 4).

Human inflammatory skin diseases also involve T $\gamma$  $\delta$ 17 cells (22). While type 3 cytokine producing lymphocytes have been implicated in human AD progression and maintenance, the role of early IL-17 in human neonates in skin barrier maintenance has not been investigated. Emerging evidence for preprogrammed effector T cells in the gut and blood at the fetal stage (65-67) support the possibility that human and rodents share the similar lymphoid lineage developmental blueprint to generate pre-programmed lymphoid effectors early in life. Whether T $\gamma$  $\delta$ 17 cells are the main producers of IL-17 in human skin requires definitive resolution, but *a priori*, any type 3 cytokine producing innate lymphocytes in the skin, including MAITs, iNKT17 and ILC3 can serve the regulatory function of murine dermal T $\gamma$  $\delta$ 17 cells, likely to be dependent on the commensal community as well as genetic and environmental variations in skin fitness in the outbred populations. Clinically, IL-17 blockade is being tested to treat skin inflammatory disorders. Emerging findings of regulatory function of IL-17 in the skin raise the possibility of potential negative impacts on skin barrier function, aggravated by the emergence of IL-22 as the pathogenic effector in fulminant skin inflammatory disorders with interference of IL-17R signaling.

## **Acknowledgements**

We thank J. Harris (UMMS) and K. Nagao (NIH) for reagents, the Immunological Genome Project Consortium for RNAseq data generation, A. Reboldi for critical reading of the manuscript, and UMMS FACS Core for cell sorting. Supported by NIH grants AI101301, ARO71269 to J.K.

## MATERIALS AND METHODS

### *Mice*

All mice were housed in specific pathogen-free (SPF) conditions, and all procedures were approved by the University of Massachusetts Medical School (UMMS) IACUC. *Sox13*<sup>-/-</sup> mice have been described previously (25), and are maintained on a 129S1/SvImJ (129) background as C57BL/6 (B6). *Sox13*<sup>-/-</sup> mice are embryonic lethal. B6, B6.129P2-*Tcrb*<sup>tm1Mom/J</sup> (B6.*Tcrb*<sup>-/-</sup>), *Rora*<sup>-/-</sup> and B6.*Il17a*<sup>tm1Bcgen</sup> (B6.*Il17a-Egfp*) mice were purchased from Jackson Laboratories. Germ-free B6/129 mice were from HDDC Gnotobiotics Core, Harvard. To generate 129.*Sox13*<sup>-/-</sup>*Tcrb*<sup>-/-</sup>, B6.*Tcrb*<sup>-/-</sup> was backcrossed to 129 mice for 9 generations, and then intercrossed with *Sox13*<sup>-/-</sup> mice to generate double knockout mice. B6.Cg-Thy1a/Cy Tg(*Tcrab*)8Rest/J (PMEL Tg) mice were kindly provided by John Harris (UMMS).

### *Cell isolation and stimulation and antibodies*

Ears and muzzle skin were first treated with Nair for 2 min, and then Nair was gently wiped away with a PBS-moistened cotton-tip applicator, and tissue was subsequently rinsed extensively with PBS prior to digestion. For this study, muzzle tissue is demarcated by the boundaries of the vibrissae. Ears were split into dorsal and ventral halves, and muzzle tissue was removed of subcutaneous tissue. Skin was finely minced and then digested with 1 U/mL Liberase TL (Roche) + 0.5 mg/mL Hyaluronidase (Sigma-Aldrich) + 0.05 mg/mL DNase (Roche) dissolved in HBSS (with Ca<sup>2+</sup>/Mg<sup>2+</sup>, Corning) + 10 mM HEPES (Gibco) + 5% FBS (Sigma-Aldrich) for 90 min at 37°C with gentle shaking. After digestion, EDTA (Sigma-Aldrich) was added at 5-10 mM, and then tissue was strained through a 100 µm cell strainer. Cells were washed in FACS buffer (DPBS, Ca<sup>2+</sup>/Mg<sup>2+</sup>-free + 0.5% BSA [Fisher Scientific] + 2 mM EDTA) and then plated for antibody staining. Mandibular and parotid dLN were mechanically homogenized between etched glass slides (Fisher Scientific) and strained through 70 µm mesh prior to plating for antibody staining.

The following anti-mouse antibodies were purchased from Biolegend, BD Biosciences, or ThermoFisher and used for FACS analysis: CD45 (30-F11), Siglec F (S17007L), Ly-6G (1A8), Ly-6C (HK1.4), MHC II (M5/114.15.2), CD3 (17A2), CD5 (53-7.3), B220 (RA3-6B2), CD11b (M1/70), Gr-1 (RB6-8C5), Ter-119 (Ter-119), Thy1.2 (30-H12), F4/8 (BM8), TCRβ (H57-597), CD4 (GK1.5), CD8β (YTS156.7.7), PD-1 (29F.1A12), CXCR5 (2G8), GL7 (GL7), CD95 (Jo2), CD138 (281-2), IgD (11-26c.2a), Vβ4 (KT4), CD49f (GoH3), TCRδ (GL3), Vγ2 (UC3-10A6), Vγ3 (536), CCR6 (140706), IL-17A (17B7), IL-22 (poly5164), IFNγ (XMG1.2), IL-4 (11B11), IL-5 (DIH37), IL-13 (eBio13A), FoxP3 (FJK-16s), GATA3 (TWAJ), RORγt (AFKJS-9), Bcl6 (K112-91), Ki-67 (B56). MR1 and CD1d tetramers were provided by the NIH Tetramer Core Facility at Emory University. All samples were labeled with a fixable viability dye (ThermoFisher) prior to analysis. The combinatorial TCR Vβ staining strategy has been described previously (68), and all Vβ epitopes were found to be resistant to the enzymes used for digestion when tested on dLN cells (data not shown). CellTrace Violet was purchased from ThermoFisher, and cells were labeled as recommended by the manufacturer. For intracellular cytokine staining, cells were fixed/permeabilized with Cytfix/Cytoperm buffer (BD Biosciences) and then stained in permeabilization buffer. For intranuclear transcription factor staining, cells were fixed/permeabilized and then stained using the FoxP3/transcription factor Staining Buffer Set (eBioscience).

For *in vitro* restimulation, digested skin cells or dLN cells were resuspended in complete DMEM-10 medium (DMEM, high glucose + 10 mM HEPES + 4 mM L-Glutamine + 1x non-essential amino acids + 1 mM sodium pyruvate + 100 U/mL penicillin + 100 ug/mL streptomycin [all Gibco] + 10% FBS) and cultured with 500 ng/mL phorbol 12,13 dibutyrate (PdBu, Tocris) + 1  $\mu$ M Ionomycin (Sigma-Aldrich) + 1x GolgiStop + 1x GolgiPlug (BD Biosciences) for 2-3 h at 37°C. After stimulation, cells were washed in FACS buffer and then stained with antibodies as indicated above. Serum IgE was assessed by ELISA (BioLegend). To deplete CD4<sup>+</sup> T cells, mice were injected i.p. with anti-CD4 (GK1.5, Bio X cell) or rat IgG2b isotype control. Initially, mice received two doses of 500  $\mu$ g/mouse on day 0 and day 2. Thereafter, mice received a weekly maintenance dose of 100  $\mu$ g/mouse to maintain depletion. Depletion was confirmed by analysis of dLN and skin T cells stained with anti-CD4 clone RM4-4 (Biolegend), which binds a non-overlapping epitope.

#### *Histology and immunofluorescence microscopy*

For H & E staining, muzzle tissue was first fixed in 10 % neutral-buffered formalin for 24 h, and then paraffin embedded, sectioned, and stained by the UMMS DERC Morphology Core. Epidermal thickness was calculated using ImageJ, taking the average of 3 measurements per image to record as 1 data point. For immunofluorescence microscopy, dLN were fixed in 4% paraformaldehyde (diluted from 16% ampules, Electron Microscopy Sciences) in PBS for 6-8 h at 4°C, washed three times in PBS, equilibrated in 30% sucrose in PBS overnight, and then frozen in OCT compound (Sakura Tissue-Tek). Cryosections were cut to 7  $\mu$ m thickness, blocked in PBS + 0.3% Triton X-100 + 5% normal mouse serum for 1 h at RT, then endogenous biotin was blocked using the Avidin/Biotin Blocking System (BioLegend) as recommended. Primary antibody labeling was performed in blocking buffer overnight at 4°C in a humidified chamber using the following antibodies: anti-CD4 Alexa Fluor 647 (BioLegend), goat anti-IgD purified (Cedarlane Labs), anti-GL7 Alexa Fluor 488 (BioLegend), and anti-CD11c Brilliant Violet 421 (BioLegend). Slides were washed 3x in PBS, and then labeled with donkey anti-goat Cy3 (Jackson ImmunoResearch) in blocking buffer for 1 h at RT. Slides were rinsed 3x in PBS and mounted using Fluoromount-G (Southern Biotech). Images were acquired on a Zeiss Axio Observer with LED excitation using ZEN software (Zeiss) and displayed using best-fit parameters.

#### *TCR CDR3 deep sequencing*

The strategy for deep sequencing of TCR V $\beta$ 4 CDR3 regions has been described previously (69). Cells from pooled muzzle and ear skin of 6 mo LMC and *Sox13*<sup>-/-</sup> mice with AD were sorted via FACS as Live CD45<sup>+</sup> TCR $\beta$ <sup>+</sup> CD4<sup>+</sup> CD25<sup>-</sup> GITR<sup>lo</sup> to exclude Treg cells. RNA was extracted using Trizol (ThermoFisher), and cDNA generated using oligo dT priming and OminScript reverse transcriptase (Qiagen) per the manufacturers' recommendations. PCR was performed using a V $\beta$ 4- or V $\alpha$ 4-specific forward primer containing adapter and barcode sequences combined with a C $\beta$  or C $\alpha$  reverse primer. Multiple forward primers were used for V $\alpha$ 4 to ensure coverage of the entire V $\alpha$ 4 family. Sequencing was performed on an Illumina MiSeq at the Deep Sequencing Core Lab. For analysis, low quality (Q score <25) reads were removed and then sequences were parsed based on the sample barcode using fastq-multx. TCR V and J nucleotide sequences were converted to amino acid sequences using TCRKlass, using the conserved Cys residue of TCR V $\beta$  to identify CDR3 position 1.

#### *Microbiome sequencing, antibiotics, and in vitro bacterial/ $\gamma\delta$ cell cultures*

To sequence the muzzle microbiome of LMC and *Sox13*<sup>-/-</sup> mice, sterile cotton-tip applicators were swabbed across both sides of the muzzle and then placed into sterile Eppendorf tubes and placed onto dry ice. Muzzle swabs were sent to Molecular Research LP (MR DNA, Shallowater, TX) for DNA extraction and sequencing on an Illumina MiSeq. Extracted DNA was used to amplify the 16S V4 region, and then amplicons were purified for library generation. For analysis, low quality and short sequences (<150bp) were removed. Operational taxonomic units were identified and classified using BLASTn and a curated database derived from NCBI, RDPII, and GreenGenes. Count files were then converted to percentages by dividing the number of counts for a given phylum/species by the sum of all counts. For antibiotic treatment, *Sox13*<sup>-/-</sup> breeders were placed on drinking water containing 0.5 mg/mL enrofloxacin and 0.5 mg/mL cefazolin (hereafter Abx). Weaned mice were then placed on Abx water and analyzed at 6 mo. To assess  $\gamma\delta$  cell responses to skin commensals, LN  $\gamma\delta$  T cells were isolated from WT 129 mice by negative selection (without the use of anti-TCR $\delta$  Abs). CD11c<sup>+</sup> cells were isolated from spleens using CD11c microbeads (Miltenyi Biotec). *Corynebacteria* were grown on brain heart infusion agar (BHI) with 1% Tween-80, then grown in BHI broth with 1% Tween-80 overnight. *Staphylococcus* was grown on trypticase soy agar, then grown in BHI broth overnight. *C. accolens* was purchased from ATCC. *C. bovis* and *C. mastitidis* were kindly provided by K. Nagao (National Institute of Arthritis and Musculoskeletal and Skin Diseases, (9)). *S. lentus* was isolated from the muzzle skin of a *Sox13*<sup>-/-</sup> mouse with AD by streaking onto mannitol salt agar, followed by re-streaking of an isolated, mannitol-fermenting colony. Species identification was determined by sequencing analysis of 16S V1-V3 followed by BLAST. The day of the experiment, bacterial cultures were subcultured 1:100 for 2-4 hours to permit recovery into exponential growth phase. Culture density was determined by OD600, and then bacteria were resuspended in PBS and heat-killed at 56°C for 1 hour. DC,  $\gamma\delta$  T cells, and bacteria were cultured at 1:1:10 ratio for 16-18 h, and then GolgiStop and GolgiPlug were added for an additional 4 h prior to FACS analysis. In some cases, anti-IL-23 (MMP19B2, BioLegend) and anti-IL-1R (JAMA-147, Bio X Cell) or isotype control antibodies were added for the entire culture duration. To assess contact dependency, DC and bacteria were placed in the top chamber of a 0.4  $\mu$ m TransWell apparatus (Corning) and  $\gamma\delta$  T cells in the bottom well.

### *Gene expression analysis*

For RT-qPCR analysis of whole skin, skin was excised and stored in RNALater (ThermoFisher) overnight at 4°C. The next day, the sample was homogenized in Trizol using an Omni Tissue homogenizer, and then RNA isolated. RNA was converted to cDNA using oligo dT priming and AffinityScript reverse transcriptase (Agilent). qPCR was performed using iQ SYBR green Supermix and a CFX96 thermal cycler (Bio-rad), followed by thermal melt curve analysis to confirm specific amplification. Primers used in this study were synthesized by Integrated DNA Technologies and are reported in Supplemental Table 1. For RNA sequencing analysis, epidermal keratinocytes were purified by first separating dorsal and ventral halves of dissected ears and floating dermis down on 5 U/mL dispase (Sigma-Aldrich) with 0.05 mg/mL DNase I for 50 min at 37 °C. Epidermis was then peeled away, and the dermis discarded. The Epidermis was further minced and then digested for an additional 30 min with 2 mg/mL Collagenase IV (Worthington) with 0.05 mg/mL DNase I. Epidermal single cell suspensions were then labeled with anti-CD49f to identify basal keratinocytes, anti-CD45 to exclude leukocytes, and 7-AAD to exclude dead cells. Keratinocytes were double-sorted for purity, with the second sort into cell lysis buffer for RNA extraction at 10<sup>4</sup> cell equivalents. Samples were generated in triplicates. RNAseq analyses were performed by the Immunological Genome Project, using the standard operating protocol



(Immgen.org). Volcano plots and DEG lists were generated using MultiPlot Studio (part of the GenePattern from the Broad Institute). Gene Ontology (GO) terms were identified using the DAVID bioinformatics resource (<https://david.ncifcrf.gov/>), with significance determined by EASE score (a modified Fisher Exact).

### *Statistical analysis*

Graphing and statistical analysis was performed using GraphPad Prism software. Significance values, tests used, and cohort sizes are indicated in figure legends. Unless otherwise indicated, comparison of two groups was analyzed by unpaired two-tailed Student's *t* test, and comparison of three or more groups was analyzed by ANOVA with Sidak's correction for multiple hypothesis testing.

## REFERENCES

1. T. E. Shaw, G. P. Currie, C. W. Koudelka, E. L. Simpson, Eczema prevalence in the United States: data from the 2003 National Survey of Children's Health. *The Journal of investigative dermatology* **131**, 67-73 (2011).
2. D. Y. Leung, E. Guttman-Yassky, Deciphering the complexities of atopic dermatitis: shifting paradigms in treatment approaches. *J Allergy Clin Immunol* **134**, 769-779 (2014).
3. A. D. Irvine, W. H. McLean, D. Y. Leung, Filaggrin mutations associated with skin and allergic diseases. *N Engl J Med* **365**, 1315-1327 (2011).
4. L. Paternoster *et al.*, Multi-ancestry genome-wide association study of 21,000 cases and 95,000 controls identifies new risk loci for atopic dermatitis. *Nature genetics* **47**, 1449-1456 (2015).
5. N. Malhotra *et al.*, IL-22 derived from gammadelta T cells restricts Staphylococcus aureus infection of mechanically injured skin. *J Allergy Clin Immunol* **138**, 1098-1107 e1093 (2016).
6. C. Koga, K. Kabashima, N. Shiraishi, M. Kobayashi, Y. Tokura, Possible pathogenic role of Th17 cells for atopic dermatitis. *The Journal of investigative dermatology* **128**, 2625-2630 (2008).
7. M. Suarez-Farinas *et al.*, Intrinsic atopic dermatitis shows similar TH2 and higher TH17 immune activation compared with extrinsic atopic dermatitis. *J Allergy Clin Immunol* **132**, 361-370 (2013).
8. A. Mirshafiey, A. Simhag, N. M. El Rouby, G. Azizi, T-helper 22 cells as a new player in chronic inflammatory skin disorders. *Int J Dermatol* **54**, 880-888 (2015).
9. T. Kobayashi *et al.*, Dysbiosis and Staphylococcus aureus Colonization Drives Inflammation in Atopic Dermatitis. *Immunity* **42**, 756-766 (2015).
10. T. Czarnowicki *et al.*, Severe atopic dermatitis is characterized by selective expansion of circulating TH2/TC2 and TH22/TC22, but not TH17/TC17, cells within the skin-homing T-cell population. *J Allergy Clin Immunol* **136**, 104-115 e107 (2015).
11. R. D. Garman, P. J. Doherty, D. H. Raulet, Diversity, rearrangement and expression of murine T cell gamma genes. *Cell* **45**, 733-742 (1986).
12. N. A. Spidale, M. Frascoli, J. Kang, gammadeltaTCR-independent origin of neonatal gammadelta T cells prewired for IL-17 production. *Current opinion in immunology* **58**, 60-67 (2019).
13. Y. Cai *et al.*, Pivotal role of dermal IL-17-producing gammadelta T cells in skin inflammation. *Immunity* **35**, 596-610 (2011).
14. S. Naik *et al.*, Compartmentalized control of skin immunity by resident commensals. *Science* **337**, 1115-1119 (2012).
15. N. Malhotra *et al.*, A network of high-mobility group box transcription factors programs innate interleukin-17 production. *Immunity* **38**, 681-693 (2013).
16. E. E. Gray *et al.*, Deficiency in IL-17-committed Vgamma4(+) gammadelta T cells in a spontaneous Sox13-mutant CD45.1(+) congenic mouse substrain provides protection from dermatitis. *Nature immunology* **14**, 584-592 (2013).
17. L. Riol-Blanco *et al.*, Nociceptive sensory neurons drive interleukin-23-mediated psoriasisform skin inflammation. *Nature* **510**, 157-161 (2014).
18. C. Wang *et al.*, The psoriasis-associated D10N variant of the adaptor Act1 with impaired regulation by the molecular chaperone hsp90. *Nature immunology* **14**, 72-81 (2013).

19. Y. Qian *et al.*, Act1, a negative regulator in CD40- and BAFF-mediated B cell survival. *Immunity* **21**, 575-587 (2004).
20. Y. Matsushima *et al.*, An atopic dermatitis-like skin disease with hyper-IgE-emia develops in mice carrying a spontaneous recessive point mutation in the Traf3ip2 (Act1/CIKS) gene. *J Immunol* **185**, 2340-2349 (2010).
21. A. Floudas *et al.*, IL-17 Receptor A Maintains and Protects the Skin Barrier To Prevent Allergic Skin Inflammation. *J Immunol* **199**, 707-717 (2017).
22. U. Laggner *et al.*, Identification of a novel proinflammatory human skin-homing Vgamma9Vdelta2 T cell subset with a potential role in psoriasis. *J Immunol* **187**, 2783-2793 (2011).
23. F. O. Nestle, P. Di Meglio, J. Z. Qin, B. J. Nickoloff, Skin immune sentinels in health and disease. *Nature reviews* **9**, 679-691 (2009).
24. A. Toulon *et al.*, A role for human skin-resident T cells in wound healing. *J Exp Med* **206**, 743-750 (2009).
25. H. J. Melichar *et al.*, Regulation of gammadelta versus alphabeta T lymphocyte differentiation by the transcription factor SOX13. *Science* **315**, 230-233 (2007).
26. N. Malhotra *et al.*, SOX4 controls invariant NKT cell differentiation by tuning TCR signaling. *J Exp Med* **215**, 2887-2900 (2018).
27. Y. Zheng *et al.*, Interleukin-22, a T(H)17 cytokine, mediates IL-23-induced dermal inflammation and acanthosis. *Nature* **445**, 648-651 (2007).
28. H. Fujita, The role of IL-22 and Th22 cells in human skin diseases. *J Dermatol Sci* **72**, 3-8 (2013).
29. B. S. Kim, Innate lymphoid cells in the skin. *The Journal of investigative dermatology* **135**, 673-678 (2015).
30. M. Salimi *et al.*, A role for IL-25 and IL-33-driven type-2 innate lymphoid cells in atopic dermatitis. *J Exp Med* **210**, 2939-2950 (2013).
31. B. Roediger, R. Kyle, G. Le Gros, W. Weninger, Dermal group 2 innate lymphoid cells in atopic dermatitis and allergy. *Current opinion in immunology* **31**, 108-114 (2014).
32. S. H. Wong *et al.*, Transcription factor RORalpha is critical for nuocyte development. *Nature immunology* **13**, 229-236 (2012).
33. P. P. Domeier, S. L. Schell, Z. S. Rahman, Spontaneous germinal centers and autoimmunity. *Autoimmunity* **50**, 4-18 (2017).
34. J. E. Harris *et al.*, A mouse model of vitiligo with focused epidermal depigmentation requires IFN-gamma for autoreactive CD8(+) T-cell accumulation in the skin. *The Journal of investigative dermatology* **132**, 1869-1876 (2012).
35. J. Meehansan *et al.*, Expression of IL-33 in the epidermis: The mechanism of induction by IL-17. *J Dermatol Sci* **71**, 107-114 (2013).
36. A. Terunuma *et al.*, Stem cell activity of human side population and alpha6 integrin-bright keratinocytes defined by a quantitative in vivo assay. *Stem Cells* **25**, 664-669 (2007).
37. A. Sada *et al.*, Defining the cellular lineage hierarchy in the interfollicular epidermis of adult skin. *Nat Cell Biol* **18**, 619-631 (2016).
38. E. Fuchs, Scratching the surface of skin development. *Nature* **445**, 834-842 (2007).
39. S. R. Edmondson *et al.*, Insulin-like growth factor binding protein-3 (IGFBP-3) localizes to and modulates proliferative epidermal keratinocytes in vivo. *Br J Dermatol* **152**, 225-230 (2005).

40. W. Zhang *et al.*, MicroRNA-17-92 cluster promotes the proliferation and the chemokine production of keratinocytes: implication for the pathogenesis of psoriasis. *Cell Death Dis* **9**, 567 (2018).
41. E. Magnusdottir *et al.*, Epidermal terminal differentiation depends on B lymphocyte-induced maturation protein-1. *Proceedings of the National Academy of Sciences of the United States of America* **104**, 14988-14993 (2007).
42. X. Wang *et al.*, IL-17A Promotes Pulmonary B-1a Cell Differentiation via Induction of Blimp-1 Expression during Influenza Virus Infection. *PLoS Pathog* **12**, e1005367 (2016).
43. J. Menzel-Severing *et al.*, Transcription factor profiling identifies Sox9 as regulator of proliferation and differentiation in corneal epithelial stem/progenitor cells. *Sci Rep* **8**, 10268 (2018).
44. L. Wu *et al.*, A novel IL-17 signaling pathway controlling keratinocyte proliferation and tumorigenesis via the TRAF4-ERK5 axis. *J Exp Med* **212**, 1571-1587 (2015).
45. E. A. Grice, J. A. Segre, The skin microbiome. *Nat Rev Microbiol* **9**, 244-253 (2011).
46. J. S. Cho *et al.*, IL-17 is essential for host defense against cutaneous *Staphylococcus aureus* infection in mice. *The Journal of clinical investigation* **120**, 1762-1773 (2010).
47. V. K. Ridaura *et al.*, Contextual control of skin immunity and inflammation by *Corynebacterium*. *J Exp Med* **215**, 785-799 (2018).
48. J. Duan, H. Chung, E. Troy, D. L. Kasper, Microbial colonization drives expansion of IL-1 receptor 1-expressing and IL-17-producing gamma/delta T cells. *Cell host & microbe* **7**, 140-150 (2010).
49. C. E. Sutton *et al.*, Interleukin-1 and IL-23 induce innate IL-17 production from gammadelta T cells, amplifying Th17 responses and autoimmunity. *Immunity* **31**, 331-341 (2009).
50. H. Kawasaki *et al.*, Altered stratum corneum barrier and enhanced percutaneous immune responses in filaggrin-null mice. *J Allergy Clin Immunol* **129**, 1538-1546 e1536 (2012).
51. S. P. Saunders *et al.*, Tmem79/Matt is the matted mouse gene and is a predisposing gene for atopic dermatitis in human subjects. *J Allergy Clin Immunol* **132**, 1121-1129 (2013).
52. M. K. Oyoshi *et al.*, Leukotriene B4-driven neutrophil recruitment to the skin is essential for allergic skin inflammation. *Immunity* **37**, 747-758 (2012).
53. J. Li *et al.*, Counterregulation between thymic stromal lymphopoietin- and IL-23-driven immune axes shapes skin inflammation in mice with epidermal barrier defects. *J Allergy Clin Immunol*, (2016).
54. C. Zuany-Amorim *et al.*, Requirement for gammadelta T cells in allergic airway inflammation. *Science* **280**, 1265-1267 (1998).
55. M. Lahn *et al.*, Negative regulation of airway responsiveness that is dependent on gammadelta T cells and independent of alphabeta T cells. *Nature medicine* **5**, 1150-1156 (1999).
56. X. J. Guo *et al.*, Lung gammadelta T Cells Mediate Protective Responses during Neonatal Influenza Infection that Are Associated with Type 2 Immunity. *Immunity* **49**, 531-544 e536 (2018).
57. M. Girardi *et al.*, Resident skin-specific gammadelta T cells provide local, nonredundant regulation of cutaneous inflammation. *J Exp Med* **195**, 855-867 (2002).
58. R. L. O'Brien *et al.*, Protective role of gammadelta T cells in spontaneous ocular inflammation. *Invest Ophthalmol Vis Sci* **50**, 3266-3274 (2009).

59. A. J. St Leger *et al.*, An Ocular Commensal Protects against Corneal Infection by Driving an Interleukin-17 Response from Mucosal gammadelta T Cells. *Immunity* **47**, 148-158 e145 (2017).
60. B. S. Sheridan *et al.*, gammadelta T cells exhibit multifunctional and protective memory in intestinal tissues. *Immunity* **39**, 184-195 (2013).
61. A. C. Kohlgruber *et al.*, gammadelta T cells producing interleukin-17A regulate adipose regulatory T cell homeostasis and thermogenesis. *Nature immunology* **19**, 464-474 (2018).
62. C. Jin *et al.*, Commensal Microbiota Promote Lung Cancer Development via gammadelta T Cells. *Cell* **176**, 998-1013 e1016 (2019).
63. K. Narayan *et al.*, Intrathymic programming of effector fates in three molecularly distinct gammadelta T cell subtypes. *Nature immunology* **13**, 511-518 (2012).
64. J. L. Linehan *et al.*, Non-classical Immunity Controls Microbiota Impact on Skin Immunity and Tissue Repair. *Cell* **172**, 784-796 e718 (2018).
65. X. Zhang *et al.*, CD4 T cells with effector memory phenotype and function develop in the sterile environment of the fetus. *Sci Transl Med* **6**, 238ra272 (2014).
66. R. Schreurs *et al.*, Human Fetal TNF-alpha-Cytokine-Producing CD4(+) Effector Memory T Cells Promote Intestinal Development and Mediate Inflammation Early in Life. *Immunity* **50**, 462-476 e468 (2019).
67. N. Li *et al.*, Memory CD4(+) T cells are generated in the human fetal intestine. *Nature immunology* **20**, 301-312 (2019).
68. R. Diz *et al.*, Autoreactive effector/memory CD4+ and CD8+ T cells infiltrating grafted and endogenous islets in diabetic NOD mice exhibit similar T cell receptor usage. *PloS one* **7**, e52054 (2012).
69. B. D. Stadinski *et al.*, Hydrophobic CDR3 residues promote the development of self-reactive T cells. *Nature immunology* **17**, 946-955 (2016).

## Figure Legends

### Figure 1. Development of AD in the absence of dermal V $\gamma$ 2+ nT $\gamma$ $\delta$ 17 cells.

A) Biopsies of muzzle skin from 6 mo *Sox13*<sup>-/-</sup> and *Sox13*<sup>+/-</sup> littermate control (LMC) was analyzed by H and E staining. Black arrows identify numerous eosinophilic infiltrates in the epidermis. Representative of four experiments, each with minimum n=2/group.

B) Muzzle skin was digested and analyzed via FACS for Siglec F<sup>+</sup> eosinophils (left panels), Ly-6G<sup>+</sup> neutrophils (middle panels), Ly-6C<sup>+</sup> MHC-II<sup>lo</sup> monocytes and Ly-6C<sup>+</sup> MHC-II<sup>hi</sup> monocyte-derived dendritic cells (right panels). Data are representative of >6 similar experiments analyzing 2-3 mice per/group.

C-F) Enumeration of cell types examined in Panel B. n=6/group. \*, p<.05; \*\*, p<.01; \*\*\*, p<.001 by ANOVA.

G) Muzzle-infiltrating cells were isolated from LMC and *Sox13*<sup>-/-</sup> mice and restimulated in vitro with PdBu/ionomycin to assess production of IL-5 and IL-13 by ILCs. ILC identified as CD45<sup>+</sup> Thy1.2<sup>+</sup>Lineage markers<sup>neg</sup> (CD3/CD4/CD5/CD8/CD11b/DX5/Gr-1/TCRd/TCRb/Ter-119<sup>neg</sup>).

H) Serum IgE concentration in mice shown, aged 1-6 mo was determined by ELISA. n=3-6/group. \*, p<.05; \*\*\*, p<.001 by ANOVA.

### Figure 2. Aberrant $\alpha\beta$ T cell activation in AD of *Sox13*<sup>-/-</sup> mice.

A) Total number of the indicated T cell types recovered from skin of from 5-6mo mice were calculated using AccuCheck counting beads. n=6/group. \*, p<.05; \*\*, p<.01 by ANOVA.

B) Staining of CD4<sup>neg</sup>CD8 $\beta$ <sup>neg</sup> skin T cells with MR1/5-OP-RU tetramer identifying MAIT cells in 5 mo mice. Control MR1/6-FP tetramer staining is shown in Supp Fig. 2. Analysis is with cells are gated on B220<sup>-</sup>F4/80<sup>-</sup> TCR $\beta$ <sup>+</sup>. Data are representative of 2 independent experiments analyzing a total of 5-6 mice/group.

C) Muzzle-infiltrating cells were isolated from indicated mice, stimulated in vitro with PdBu/Ionomycin, and analyzed for  $\alpha\beta$  T cell subset-specific production of IL-17A and IL-22 and for CD4 T cell production of IL-4, and IL-13. Data are representative of >5 experiments, n=2/group minimum.

D) Total cell number enumeration in skin draining LNs (dLNs) of 6 mo mice of indicated genotype. n=6/group. \*\*\*, p<.001 by Student's *t*-test.

E) Muzzle draining mandibular LN (dLN) from 5-6 mo mice were fixed in paraformaldehyde, frozen in OCT compound, cryosectioned, and then labeled with the indicated antibodies to visualize B cell follicles (I $\gamma$  $\Delta$ <sup>+</sup>), T cell zones (CD4<sup>+</sup>), dendritic cells (CD11c<sup>+</sup>), and germinal centers (GL7<sup>+</sup> I $\gamma$  $\Delta$ <sup>-</sup>). Images are representative of two experiments.

F) Analysis of T follicular helper (Tfh) cells in dLN of 6 mo LMC and *Sox13*<sup>-/-</sup> mice. Tfh cells were identified as CD4<sup>+</sup>FoxP3<sup>neg</sup> PD-1<sup>hi</sup> CXCR5<sup>+</sup>Bcl6<sup>+</sup>. n=7-8/group. \*\*\*, p<.001 by Student's *t*-test.

G) *Sox13*<sup>-/-</sup> and *129.Tcrb*<sup>-/-</sup> mice were crossed to generate double-deficient mice, and then disease progression tracked by phenotyping and muzzle inflammation assessed by H and E staining. *Sox13*<sup>-/-</sup>*Tcrb*<sup>-/-</sup> mice do not develop overt or histological signs of AD at 6 mo. Data are representative of 10-15 mice of each genotype analyzed.

### **Figure 3. Perturbations in early basal keratinocyte transcriptome in the absence of nT $\gamma$ $\delta$ 17 cells.**

A) Epidermal basal keratinocytes were sorted from 3 and 7 wk old male LMC and *Sox13*<sup>-/-</sup> mice and subjected to gene expression analysis by RNA sequencing (in biological triplicates). Red and blue dots represent genes with fold change (FC)  $\geq 2$  and p-value  $\leq .05$  and the numbers at the bottom denote number of genes whose expression was significantly altered. Select genes are annotated.

B) Differentially expressed genes from Panel A were analyzed for Gene Ontology (GO) term enrichment using DAVID. Displayed are a selection of significantly enriched (p  $\leq .05$ , dashed line) GO terms.

C) Heatmap of differentially expressed genes (FC  $\geq 1.5$  and p-value  $\leq .05$ ) among male 3 wk old basal keratinocytes with genes involved in cell differentiation, barrier function, skin inflammation and stress response pathways annotated.

### **Figure 4. Skin commensal alterations in the absence of nT $\gamma$ $\delta$ 17 cells drive AD.**

A) Summary stacked bar charts of muzzle skin microbiome analysis of *Sox13*<sup>-/-</sup> and LMC mice at 3 mo and 6 mo. Species depicted are annotated on the right and their corresponding frequencies among total 16S rRNA sequences are shown. One experiment of three shown.

B) *Sox13*<sup>-/-</sup> mice were antibiotic (enrofloxacin and cefazolin) treated (Abx) by drinking water from 2 mo and then muzzle histology analyzed at 6 mo. Images are representative of 4 analyzed Abx-treated mice, with at least 2 sections separated by >100 microns analyzed for each mouse.

C) Serum IgE levels of Ctrl and Abx-treated *Sox13*<sup>-/-</sup> mice at 6 mo were assessed by ELISA. n=6 (Ctrl) or 10 (Abx). \*\*, P<.01 by Student's *t*-test.

D) Muzzle skin of 6 mo Ctrl and Abx *Sox13*<sup>-/-</sup> mice was analyzed for eosinophil and neutrophil infiltration via FACS. Data are representative of 9 analyzed Abx-treated mice from 3 independent cohorts.

E) Muzzle skin of 6 mo Ctrl and Abx *Sox13*<sup>-/-</sup> mice was analyzed for Th17 cytokine production post PMA/ionophore reactivation. Data are representative of 9 analyzed Abx-treated *Sox13*<sup>-/-</sup> mice from 3 independent cohorts.

F-I) Mandibular and parotid dLN cells from Ctrl and Abx *Sox13*<sup>-/-</sup> mice were analyzed for F) total cell number, and the frequency of G) Tfh cells, H) GC B cells, and I) CD138+ plasma cells. n=7-12/group pooled from 4 independent cohorts. \*\*\*, p<.001 by Student's *t*-test.

### **Figure 5. Cytokine-dependent, contact-independent T $\gamma$ $\delta$ 17 responses to skin commensals.**

A) Total  $\gamma\delta$  cells were enriched from skin-draining LN and co-cultured with antigen presenting cells and the indicated heat-killed commensal bacteria at a 1:1:10 ratio for 16-18 h, and then cultured for an additional 4 h in the presence of Golgi Stop and Plug. IL-17A and IFN $\gamma$  production were assessed by intracellular cytokine staining. Data are representative of 2 independent experiments.

B) Total  $\gamma\delta$  cells, splenic DC, and the indicated commensal bacteria were cultured at a 1:1:10 ratio as in (A) Together in a well or in a 0.4 micron TransWell apparatus in which DC and bacteria were placed in the top chamber and  $\gamma\delta$  cells were placed in the bottom chamber. Data are representative of 2 independent experiments.

C) Cultures as above with 10 ug/mL each of anti-IL-1R and anti-IL-23 neutralizing Abs or Ctrl Abs. Intracellular production of IL-17A and IFN $\gamma$  was then assessed by FACS. Data are representative of 2 independent experiments

### **Figure 6. Expansion of dominant CD4<sup>+</sup> clonotypes in *Sox13*<sup>-/-</sup> skin.**

A) Muzzle-infiltrating cells were isolated from 5-6mo LMC and *Sox13*<sup>-/-</sup> mice and analyzed for V $\beta$  usage by CD4<sup>+</sup> T cells.

B) Summary data of V $\beta$ 4<sup>+</sup> frequency among skin-infiltrating CD4<sup>+</sup> cells in LMC and *Sox13*<sup>-/-</sup> mice. n=13-17 mice. \*\*\*, p<.001 by ANOVA.

C) Enumeration of CD4<sup>+</sup> V $\beta$ 4<sup>+</sup> cells in LMC and *Sox13*<sup>-/-</sup> skin. n=6/group. \*\*\*, p<.001; \*, p<.05 by ANOVA.

D) Skin-infiltrating cells were isolated from 5 mo mice, restimulated *in vitro* with PdBu/ionomycin, and IL-17 and IL-22 production by V $\beta$ 4<sup>+</sup> and V $\beta$ 4<sup>-</sup> CD4<sup>+</sup> T cells assessed via FACS. Data are representative of >4 experiments analyzing 2-3 mice/genotype/experiment.

E) Summary data of multiple experiments performed as in Panel D. n=5-6 pooled from 3 independent experiments. \*\*\*, p<.001; \*, p<.05 by ANOVA.



F) Starting at 3 months of age, *Sox13*<sup>-/-</sup> mice were treated with control Ab (Ctrl) or a cell depleting Ab targeting CD4 antigen ( $\alpha$ CD4) until 6 mo. AD disease severity was then assessed by H and E staining of muzzle skin. Data are representative of 10 mice treated with  $\alpha$ CD4 across 2 independent experiments.

G) Epidermal thickness in Ctrl and  $\alpha$ CD4 treated *Sox13*<sup>-/-</sup> mice as assessed by analysis of histology images. n=5 mice/group. \*\*\*, p<.001 by Student's *t*-test.

H) Summary stacked bar charts of TCR V $\beta$ 4 CDR3 clonotype analysis of skin (ear and muzzle combined) infiltrating CD4<sup>+</sup> T cells in LMC and *Sox13*<sup>-/-</sup> mice by deep sequencing, focusing on the two major clonotypes. Minimal 1 million reads/sample. Each stack reports proportion of each class on the right amongst total V $\beta$ 4 CDR3 sequence reads.

I) Summary of TCR V $\alpha$ 4 CDR3 clonotype analysis by pie chart of skin-infiltrating CD4<sup>+</sup> T cells in *Sox13*<sup>-/-</sup> mice. LMC control not shown as there were insufficient reads.

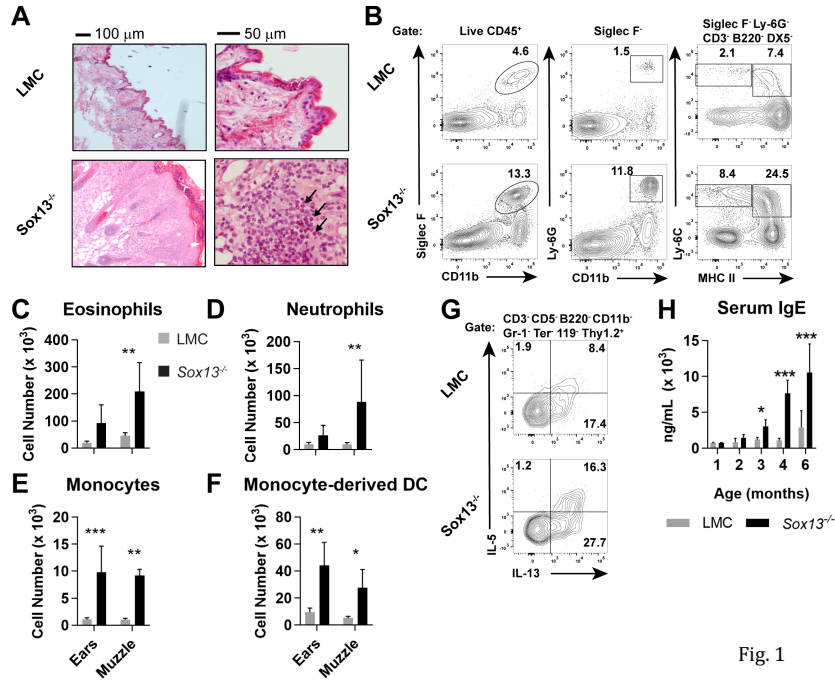

Fig. 1

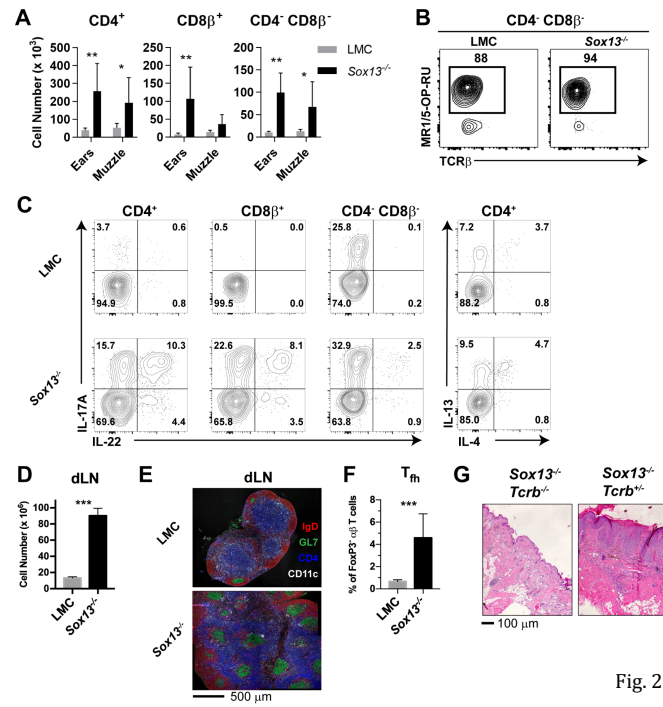

Fig. 2

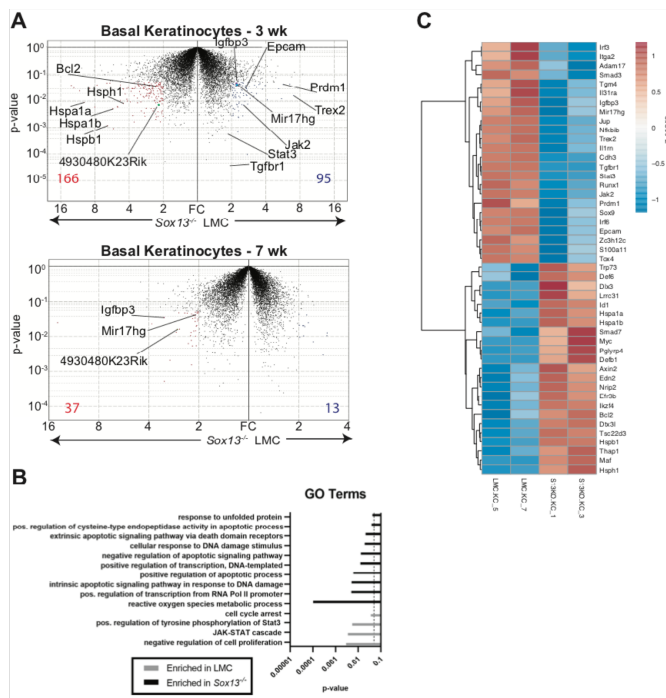

Fig. 3

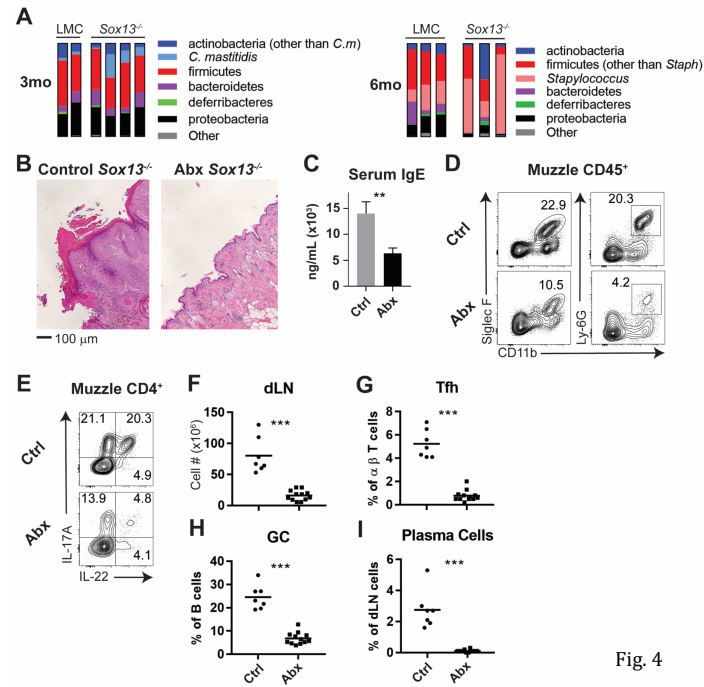

Fig. 4

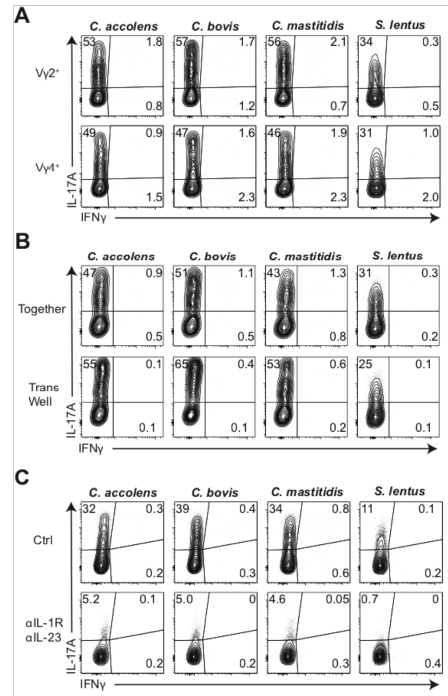

Fig. 5

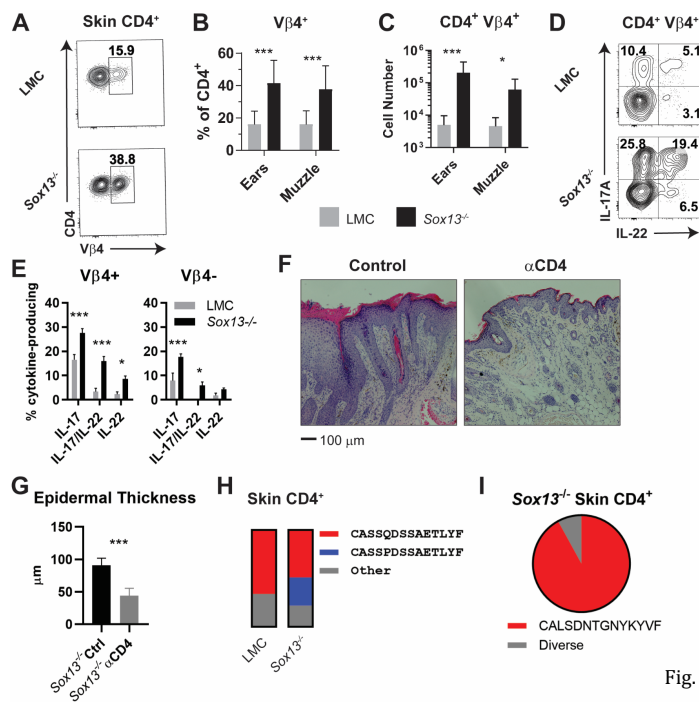

Fig. 6
